# Supplementary material for: Concordant systemic and local eosinophilia relates to poorer disease control in patients with nasal polyps
Source: PubMed Central journal article supplement — World Allergy Organ J. 2019 Aug 13;12(8):100052. doi: 10.1016/j.waojou.2019.100052 (PMC6704051; doi:10.1016/j.waojou.2019.100052), 2019-08-13
Supplement: mmc1.pdf [file mmc1.pdf]

**Table E1. Criteria for defining controlled, partly controlled and uncontrolled CRS by the EPOS 2012.**

| Assessment of Current Clinical Control of CRS in the Last Month |                                      |                                                                                  |                                                                             |
|-----------------------------------------------------------------|--------------------------------------|----------------------------------------------------------------------------------|-----------------------------------------------------------------------------|
| Characteristic                                                  | Controlled<br>(All of the following) | Partly Controlled<br>(At least one present)                                      | Uncontrolled                                                                |
| Nasal blockage                                                  | Not present or not bothersome        | Present on most days of the week                                                 |                                                                             |
| Rhinorrhea/postnasal drip                                       | Little and mucous                    | Mucopurulent on most days of the week                                            |                                                                             |
| Facial pain/headache                                            | Not present or not bothersome        | Present                                                                          |                                                                             |
| Smell                                                           | Normal or only slightly impaired     | Impaired                                                                         | Three or more features of partly controlled CRS                             |
| Sleep disturbance or fatigue                                    | Not impaired                         | Impaired                                                                         |                                                                             |
| Nasal endoscopy (if available)                                  | Healthy or almost healthy mucosa     | Diseased mucosa (nasal polyps, mucopurulent secretions, inflamed mucosa)         |                                                                             |
| Systemic medication needed to control disease                   | Not needed                           | Need of a course of antibiotics or systemic corticosteroids in the last 3 months | Need of long-term antibiotics or systemic corticosteroids in the last month |

CRS, chronic rhinosinusitis.

**Table E2. Characteristics of the total cohort.**

|                                                        | Study entry |
|--------------------------------------------------------|-------------|
| Male, n(%)                                             | 123(67.2)   |
| Age, mean(SD)                                          | 39.5(13.6)  |
| Weeks after surgery, median(IQR)                       | 79.3(69.1)  |
| Smoking status, n(%)                                   |             |
| Non-smoker                                             | 163(89.1)   |
| Current smoker                                         | 18(9.8)     |
| Ex-smoker                                              | 2(1.1)      |
| Allergic rhinitis, n(%)                                | 20(10.9)    |
| Asthma, n(%)                                           | 23(12.6)    |
| Prior sinus surgery, n(%)                              |             |
| 0                                                      | 126(68.9)   |
| 1                                                      | 45(24.6)    |
| 2                                                      | 6(3.3)      |
| 3                                                      | 4(2.2)      |
| 4                                                      | 2(1.1)      |
| Preoperative L-K endoscopic score, median(IQR)         | 9.0(3.0)    |
| Preoperative L-M CT score, median(IQR)                 | 15.0(8.0)   |
| Blood eosinophil count, median(IQR)( $\times 10^9/L$ ) | 0.23(0.3)   |
| Blood eosinophil percentage, median(IQR)(%)            | 3.0(4.7)    |
| Tissue eosinophil count, median(IQR)/(HPF)             | 29.0(72.0)  |
| Tissue eosinophil percentage, median(IQR)(%)           | 8.4(29.5)   |
| Post-operative TNSS, median(IQR)                       | 2.0(3.0)    |
| Medication length after surgery, n(%)                  |             |
| >6 months                                              | 99(54.1)    |
| $\leq 6$ months                                        | 84(45.9)    |

*SD*, standard deviation; *IQR*, interquartile range; *L-K*, Lund-Kennedy; *L-M*, Lund-Mackay; *CT*, computed tomography; *HPF*, high power field; *TNSS*, total nasal symptom score.
