# Supplementary figures and images for: Concordant systemic and local eosinophilia relates to poorer disease control in patients with nasal polyps
Source: PubMed Central journal article supplement — World Allergy Organ J. 2019 Aug 13;12(8):100052. doi: 10.1016/j.waojou.2019.100052 (PMC6704051; doi:10.1016/j.waojou.2019.100052), 2019-08-13

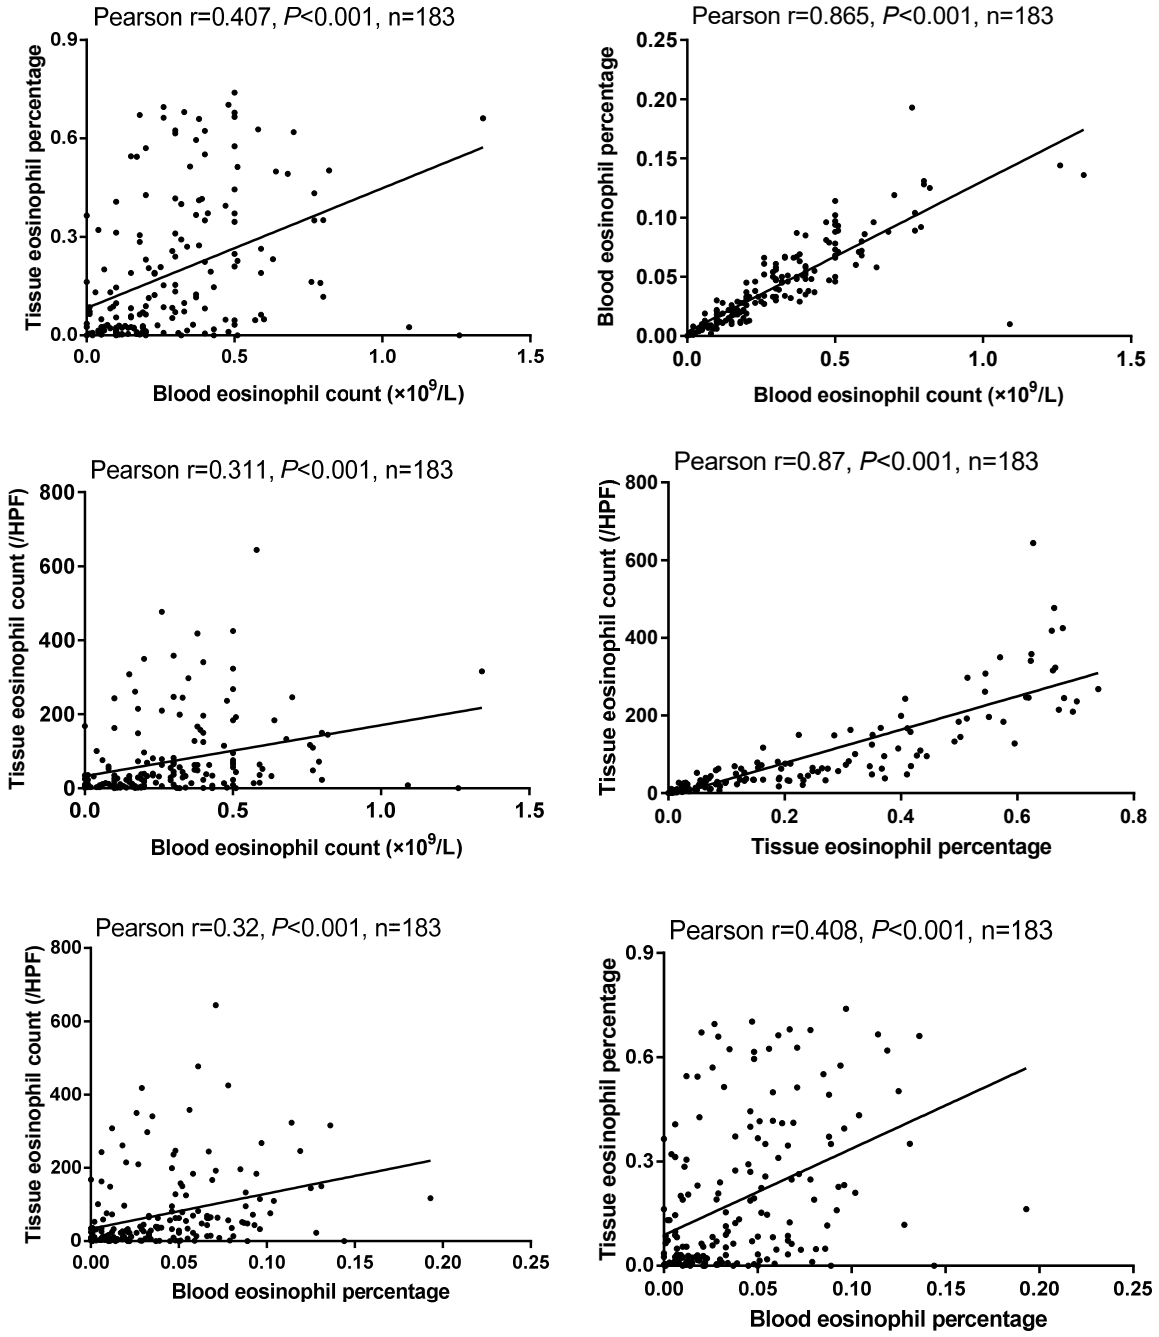

FIGURE E1

Supplement: mmc2.pdf [file mmc2.pdf]
